# Supplementary material
Source: publisher figshare collection journal article supplement (https://frontiersin.figshare.com/ndownloader/files/34078400)
Supplement: Supplementary file [file 34078400]

# 1 Supplementary Figures

(A)

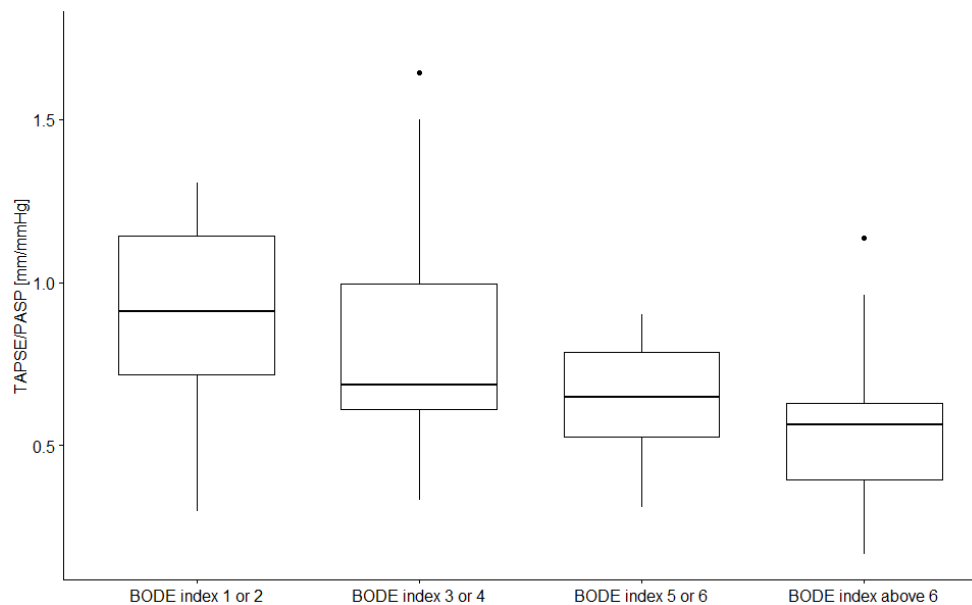

(B)

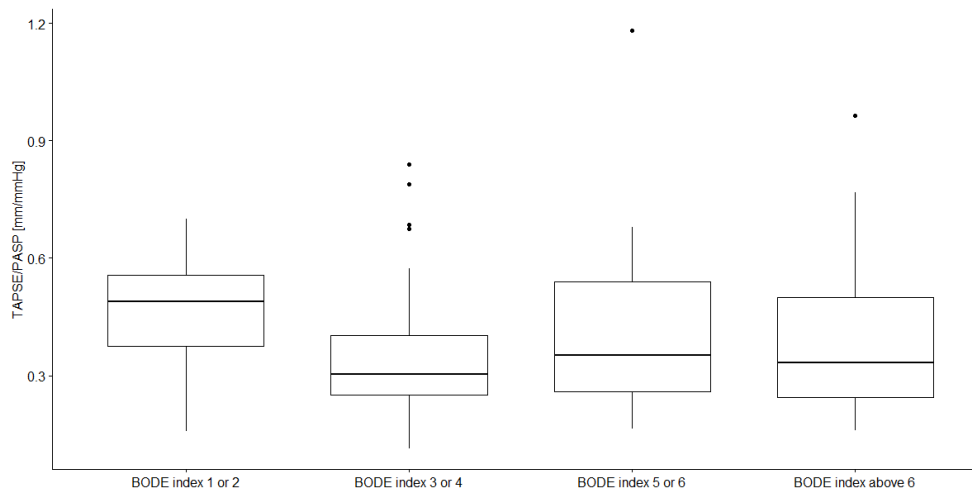

**SUPPLEMENTARY FIGURE S1 |** TAPSE/PASP ratio stratified by BODE index in (A) patients with COPD without PH (Kruskal–Wallis  $p = 0.034$ ;  $n = 51$ ) and (B) patients with PH due to COPD (Kruskal–Wallis  $p = 0.50$ ;  $n = 85$ ). Medians, IQRs, maximum and minimum values (within 1.5x the IQR from the upper and lower quartiles) and outliers are shown. BODE, body mass index, obstruction, dyspnoea and exercise capacity; COPD, chronic obstructive pulmonary disease; IQR, interquartile range; PH, pulmonary hypertension; TAPSE/PASP, tricuspid annular plane systolic excursion/pulmonary artery systolic pressure.

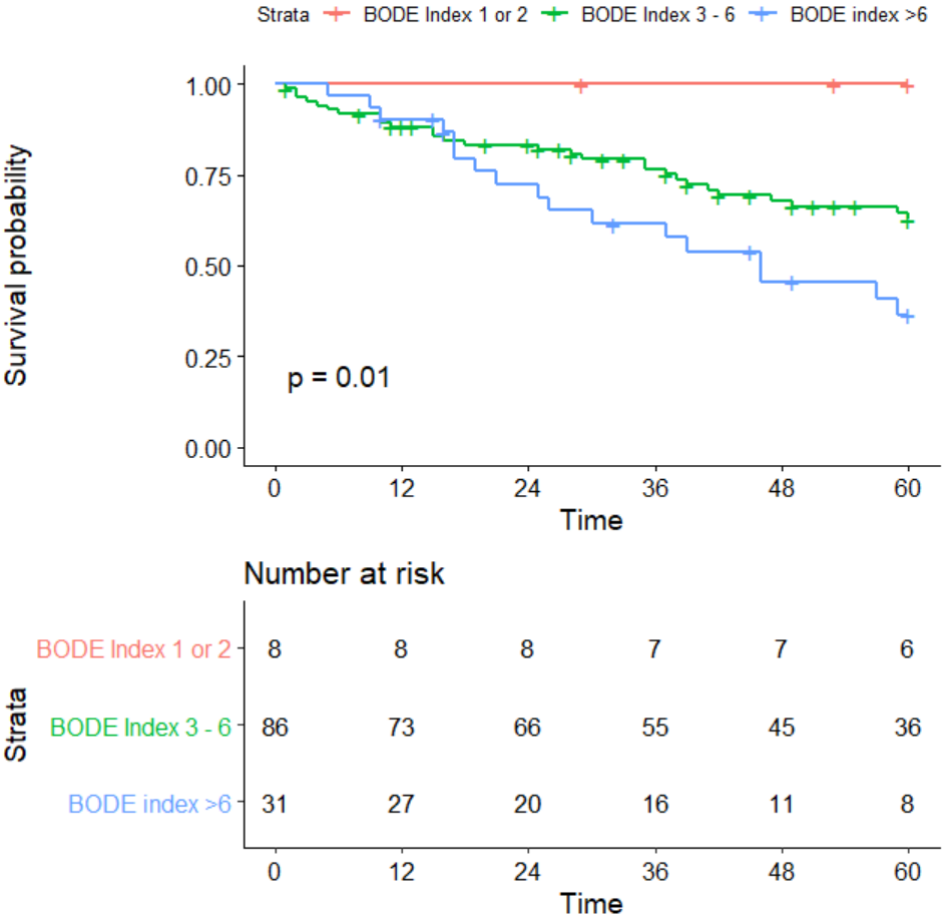

**SUPPLEMENTARY FIGURE S2** | Kaplan–Meier curves of survival probability in patients with pulmonary hypertension due to chronic obstructive pulmonary disease stratified by BODE index. BODE, body mass index, obstruction, dyspnoea and exercise capacity.

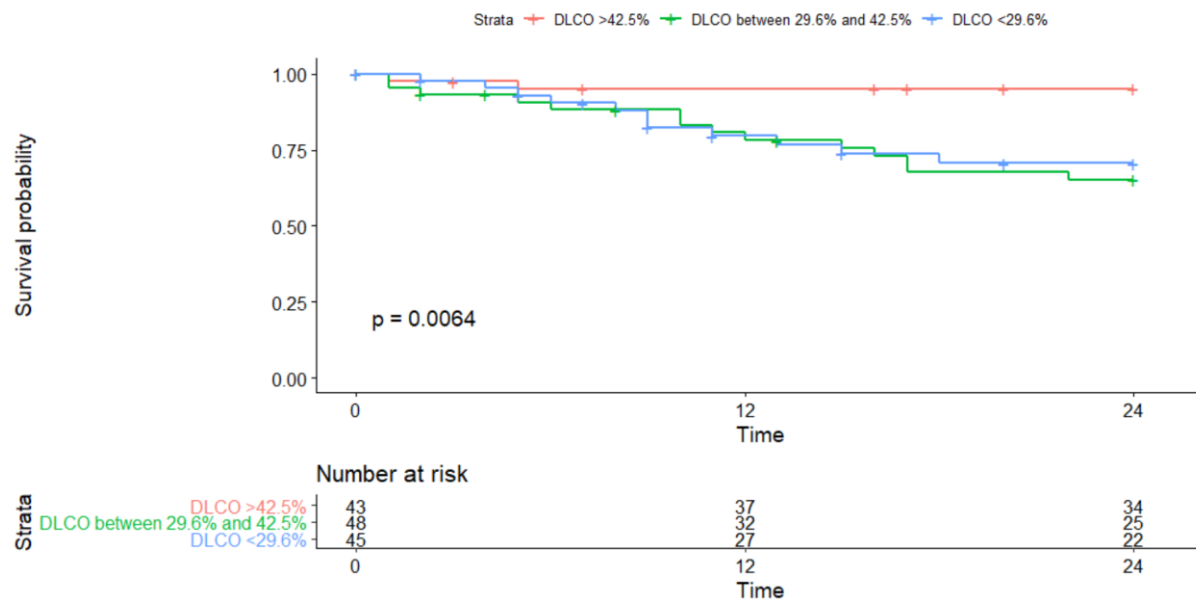

**SUPPLEMENTARY FIGURE S3** | Kaplan–Meier curves of survival probability in patients with pulmonary hypertension due to chronic obstructive pulmonary disease stratified by DLCO tertile. A significant difference in short-term survival (truncated at 2 years) was observed. Consistent with this finding, Cox regression analysis showed a decreased risk of short-term mortality with increasing DLCO (hazard ratio: 0.968 [95% confidence interval: 0.943–0.994];  $p = 0.0159$ ). DLCO, lung diffusing capacity for carbon monoxide.

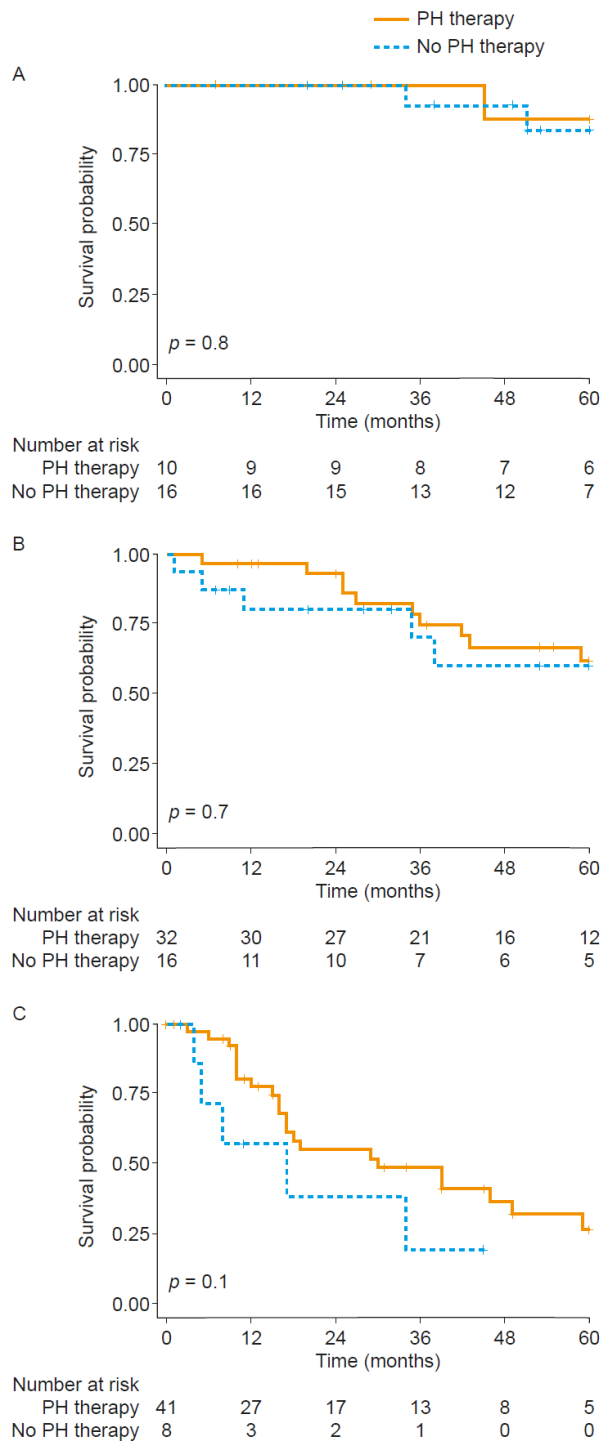

**SUPPLEMENTARY FIGURE S4** | Kaplan–Meier curves of survival probability in patients with PH due to COPD and **(A)** TAPSE/PASP > 0.35 mm/mm Hg and 6MWD > 299 m (low risk), **(B)** TAPSE/PASP > 0.35 mm/mm Hg or 6MWD > 299 m (intermediate risk) or **(C)** TAPSE/PASP ≤ 0.35 mm/mm Hg and 6MWD ≤ 299 m (high risk), stratified by use of targeted PH therapy. 6MWD, 6-minute walk distance; PH, pulmonary hypertension; TAPSE/PASP, tricuspid annular plane systolic excursion/pulmonary artery systolic pressure.

## 2 Supplementary Table

**SUPPLEMENTARY TABLE S1** | Correlation of the TAPSE/PASP ratio with haemodynamic parameters in patients with PH-COPD.

| Parameter                      | Pearson R | <i>p</i> |
|--------------------------------|-----------|----------|
| Mean pulmonary artery pressure | −0.425    | <0.001   |
| Right atrial pressure          | −0.072    | 0.344    |
| Cardiac Index                  | 0.282     | <0.001   |
| Mixed venous oxygen saturation | 0.398     | <0.001   |

PH-COPD, pulmonary hypertension due to chronic obstructive pulmonary disease; TAPSE/PASP, tricuspid annular plane systolic excursion/pulmonary artery systolic pressure.
